# Supplementary material for: The alteration of intestinal mucosal α-synuclein expression and mucosal microbiota in Parkinson’s disease
Source: PubMed Central journal article supplement (PMC10006030; doi:10.1007/s00253-023-12410-w), 2023-02-16
Supplement: 253_2023_12410_MOESM1_ESM.pdf [file 253_2023_12410_MOESM1_ESM.pdf]

# **APPLIED MICROBIOLOGY AND BIOTECHNOLOGY**

## **Supplementary materials for The alteration of intestinal mucosal $\alpha$ -synuclein expression and mucosal microbiota in Parkinson's disease**

Jihua Shi <sup>1</sup>, Yiran Wang <sup>1,2</sup>, Dan Chen <sup>1</sup>, Xue Xu <sup>1</sup>, Wenbin Li <sup>1</sup>, Kai Li <sup>3</sup>, Jing He <sup>3</sup>, Wen Su <sup>3</sup>, Qingfeng Luo <sup>1\*</sup>

1. Gastroenterology Department, Beijing Hospital, National Center of Gerontology; Institute of Geriatric Medicine, Chinese Academy of Medical Science, Beijing, China
2. Peking University Fifth School of Clinical Medicine, Beijing, China
3. Neurology Department, Beijing Hospital, National Center of Gerontology; Institute of Geriatric Medicine, Chinese Academy of Medical Science, Beijing, China

### **\* Corresponding author:**

Qingfeng Luo, Telephone number: 13811519095, Email address: luoqf2000@126.com

Postal address: Gastroenterology Department, Beijing hospital, No.1 Dahua Road, Dongdan, Dongcheng District, Beijing, China, 100730

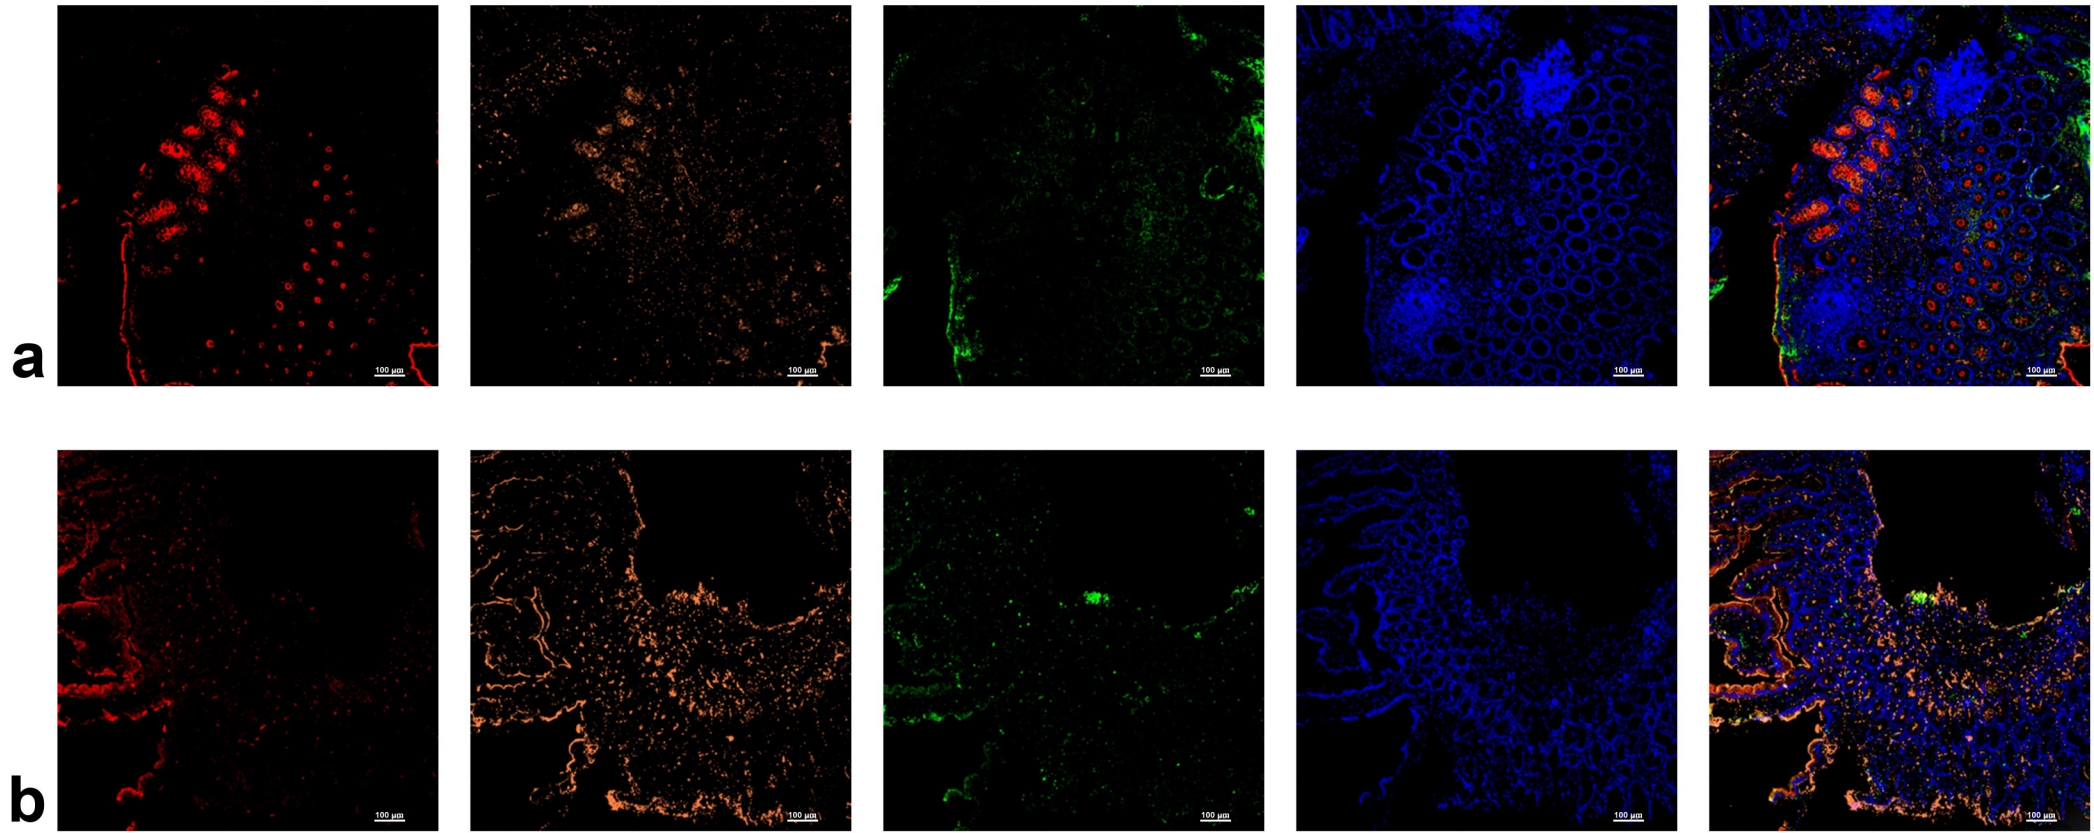

**Figure S1** The distribution of different types of  $\alpha$ Syn in duodenal mucosa of healthy control (a) and PD patients (b);  $\times 100$ . The scale bars are in the bottom right corner of each picture, indicating 100  $\mu$ m. As listed from left to right: red is total  $\alpha$ -synuclein; orange is oligomer  $\alpha$ -synuclein; green is phosphorylated  $\alpha$ -synuclein; blue is cell nucleus; multi-color is the merged picture.

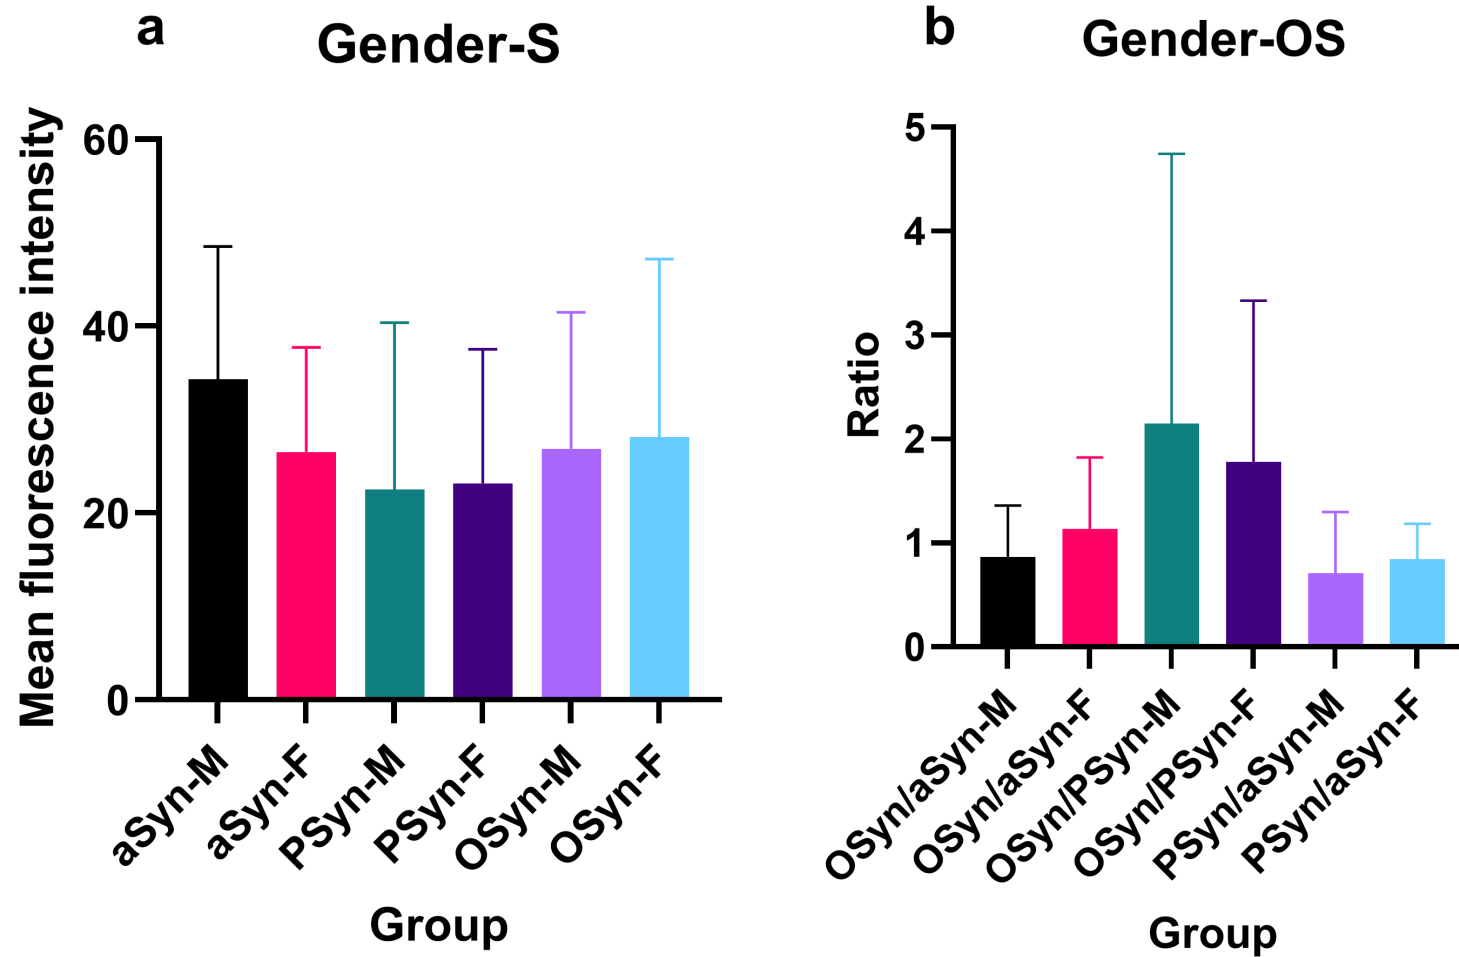

**Figure S2** The mean fluorescence intensity (a) and ratio (b) of different types of  $\alpha$ -synuclein are grouped by sex. M: male; F: female. aSyn: total  $\alpha$ -synuclein; OSyn: oligomer  $\alpha$ -synuclein; PSyn: phosphorylate  $\alpha$ -synuclein.

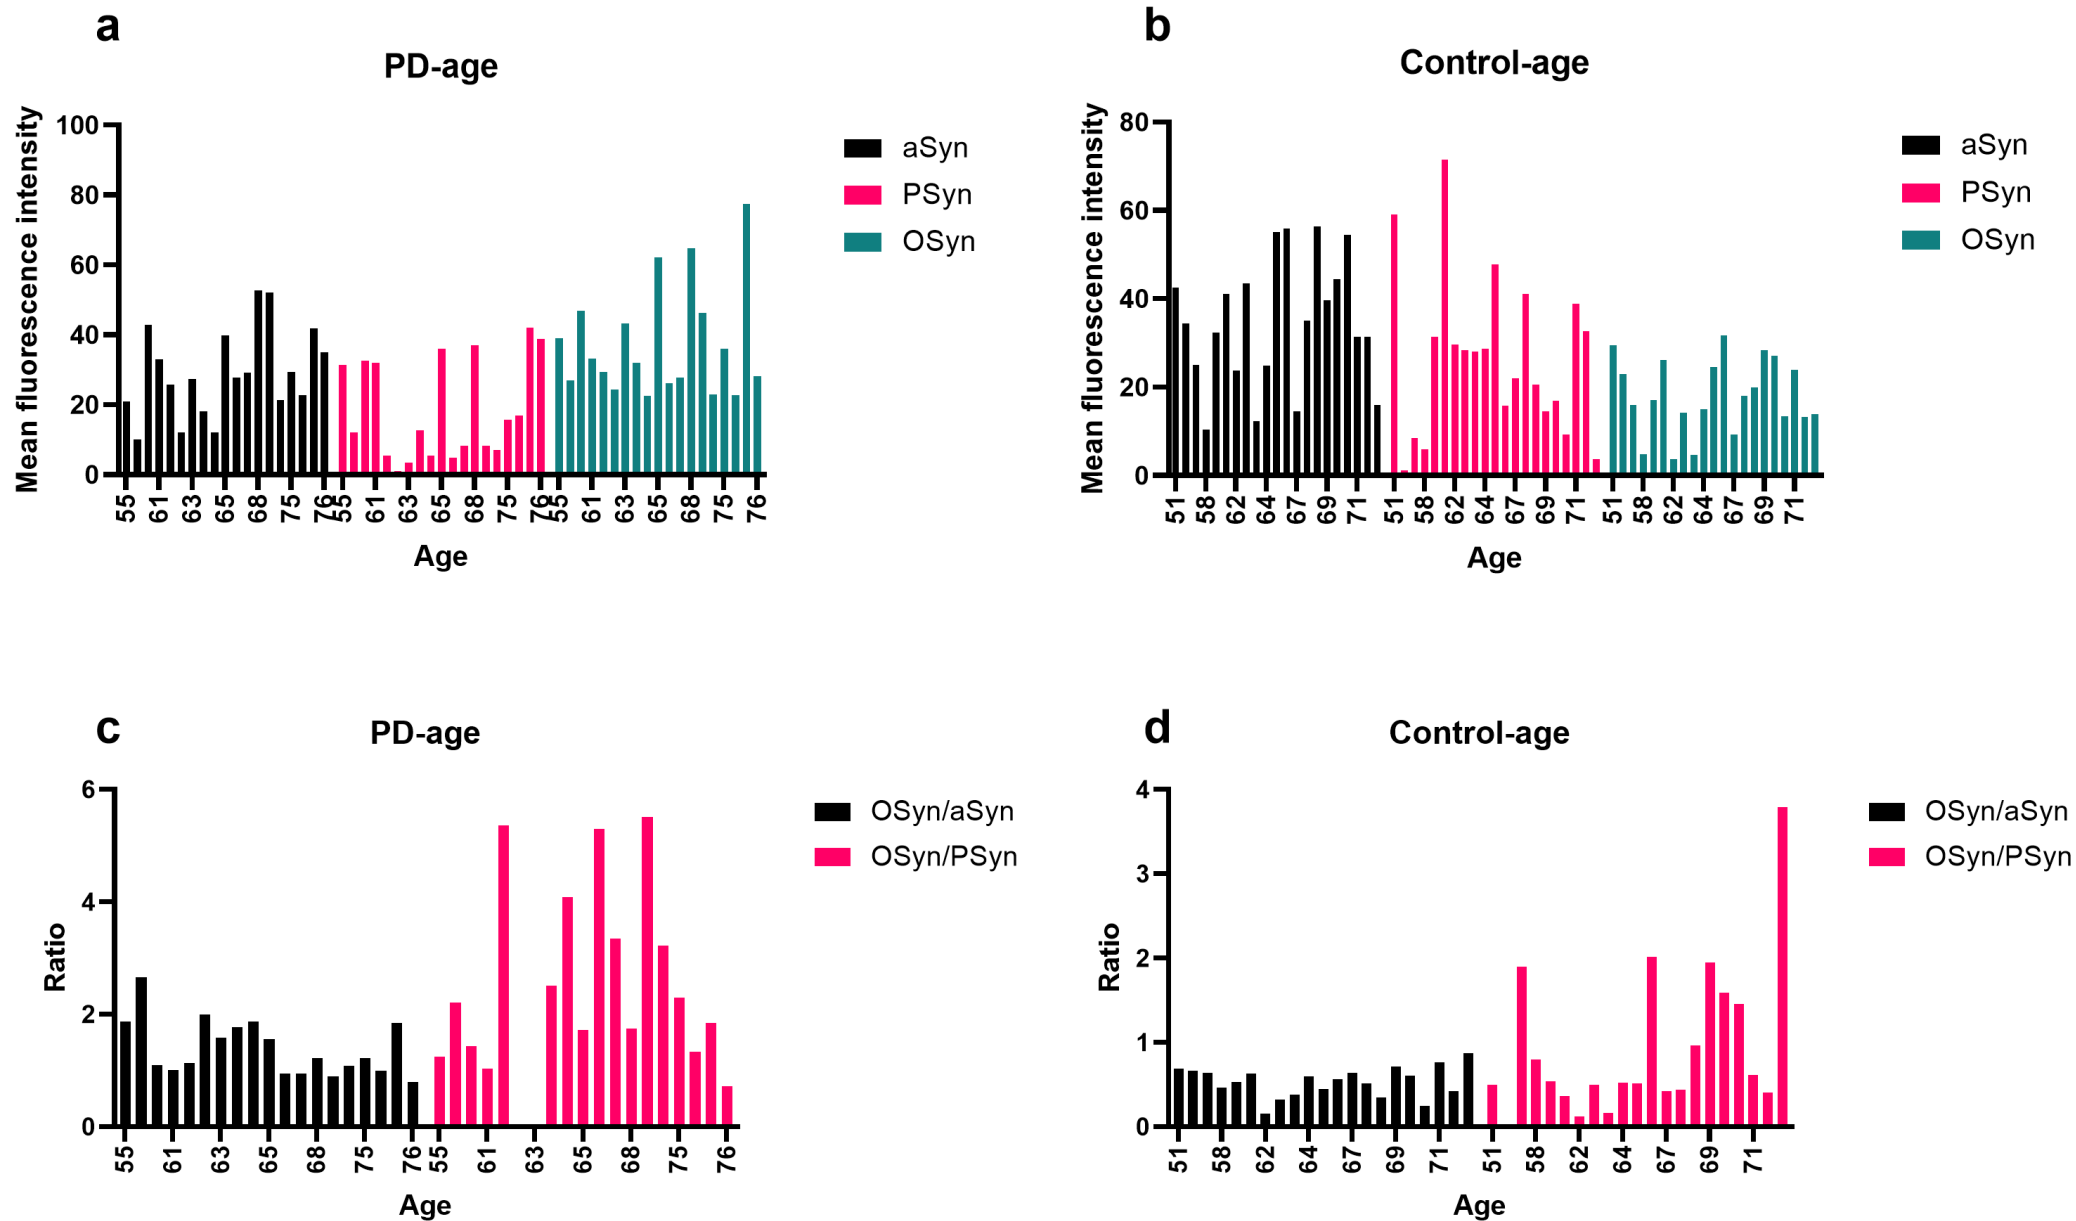

**Figure S3** The mean fluorescence intensity (a) and ratio (b) of different types of  $\alpha$ -synuclein showed according to age. aSyn: total  $\alpha$ -synuclein; OSyn: oligomer  $\alpha$ -synuclein; PSyn: phosphorylate  $\alpha$ -synuclein.

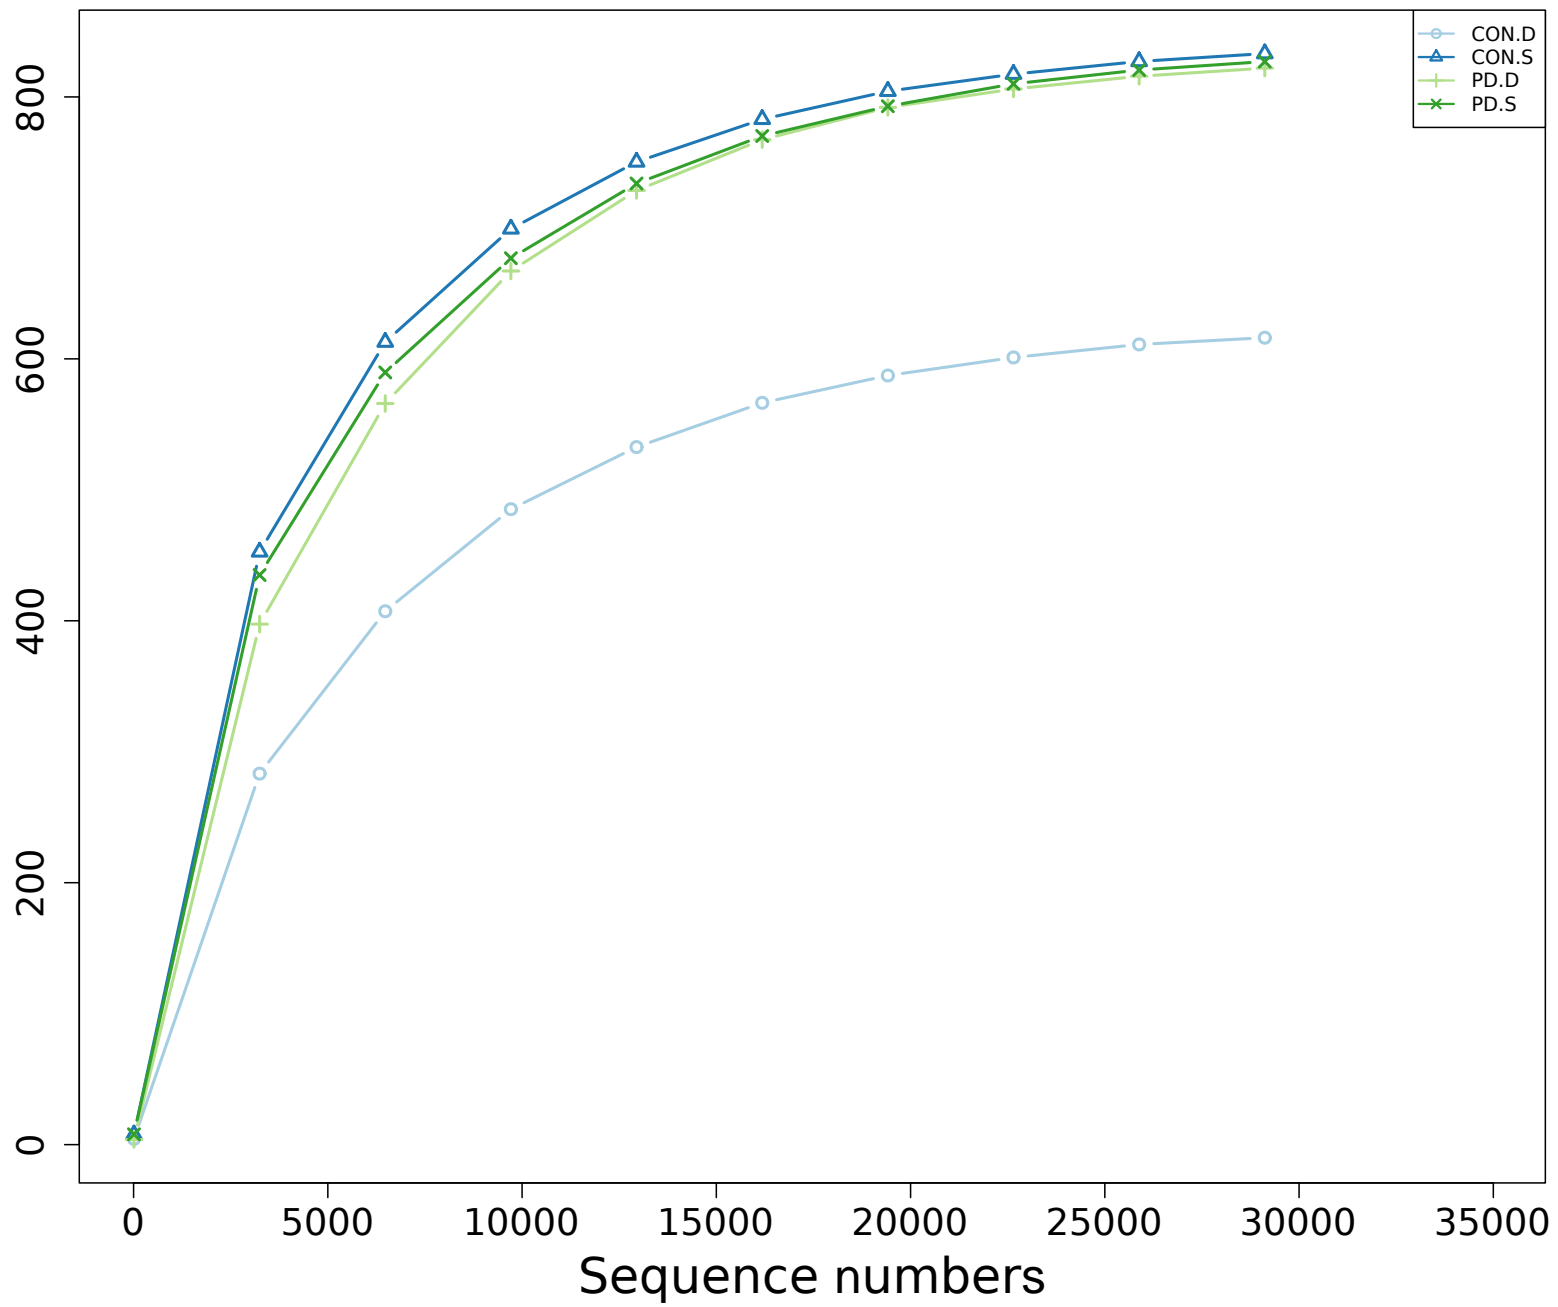

**Figure S4** Sample rarefaction curves for observed species per group.
